# Supplementary material for: A Systematic Evaluation of Effect of Adherence Patterns on the Sample Size and Power of a Clinical Study
Source: PubMed Central journal article supplement — CPT Pharmacometrics Syst Pharmacol. 2018 Oct 28;7(12):818–28. doi: 10.1002/psp4.12361 (PMC6310871; doi:10.1002/psp4.12361), 2018-10-28
Supplement: PSP4-7-818-s001.pdf [file PSP4-7-818-s001.pdf]

**Table S1** Drug holiday per month and Non-therapeutic time (NTT) for various adherence rates

| <b>S. No</b> | <b>Adherence rate (%)</b> | <b>Drug holiday/month (Days)<br/>Median (Range)</b> | <b>Non-therapeutic time (Days)<br/>Median (Range)</b> |
|--------------|---------------------------|-----------------------------------------------------|-------------------------------------------------------|
| 1.           | 50                        | 15 (8-23)                                           | 7 (1-17)                                              |
| 2.           | 60                        | 12 (5-19)                                           | 4 (0-11)                                              |
| 3.           | 70                        | 9 (2-17)                                            | 2 (0-10)                                              |
| 4.           | 80                        | 6 (1-12)                                            | 1 (0-7)                                               |
| 5.           | 90                        | 3 (0-8)                                             | 0                                                     |
| 6.           | 100                       | 0                                                   | 0                                                     |
